# Supplementary material
Source: publisher figshare collection journal article supplement (https://gsapubs.figshare.com/ndownloader/files/22741313)
Supplement: Supplementary file 1 [file 22741313]

**Data Repository item 2002087 for Bierman and Caffee**

**REPLICATION GRAPHS**

The two graphs that follow demonstrate that:

- A. measurements of  $^{10}\text{Be}$  in 1994 were very well replicated by remeasurement in 1999 and 2000, and
- B. measurements of  $^{26}\text{Al}$ , in many samples, were different by an average of 9%, rising in the remeasurement.

It is most likely that incomplete resolution of Al after HF dry down lowered stable Al yields for the earlier analyses.

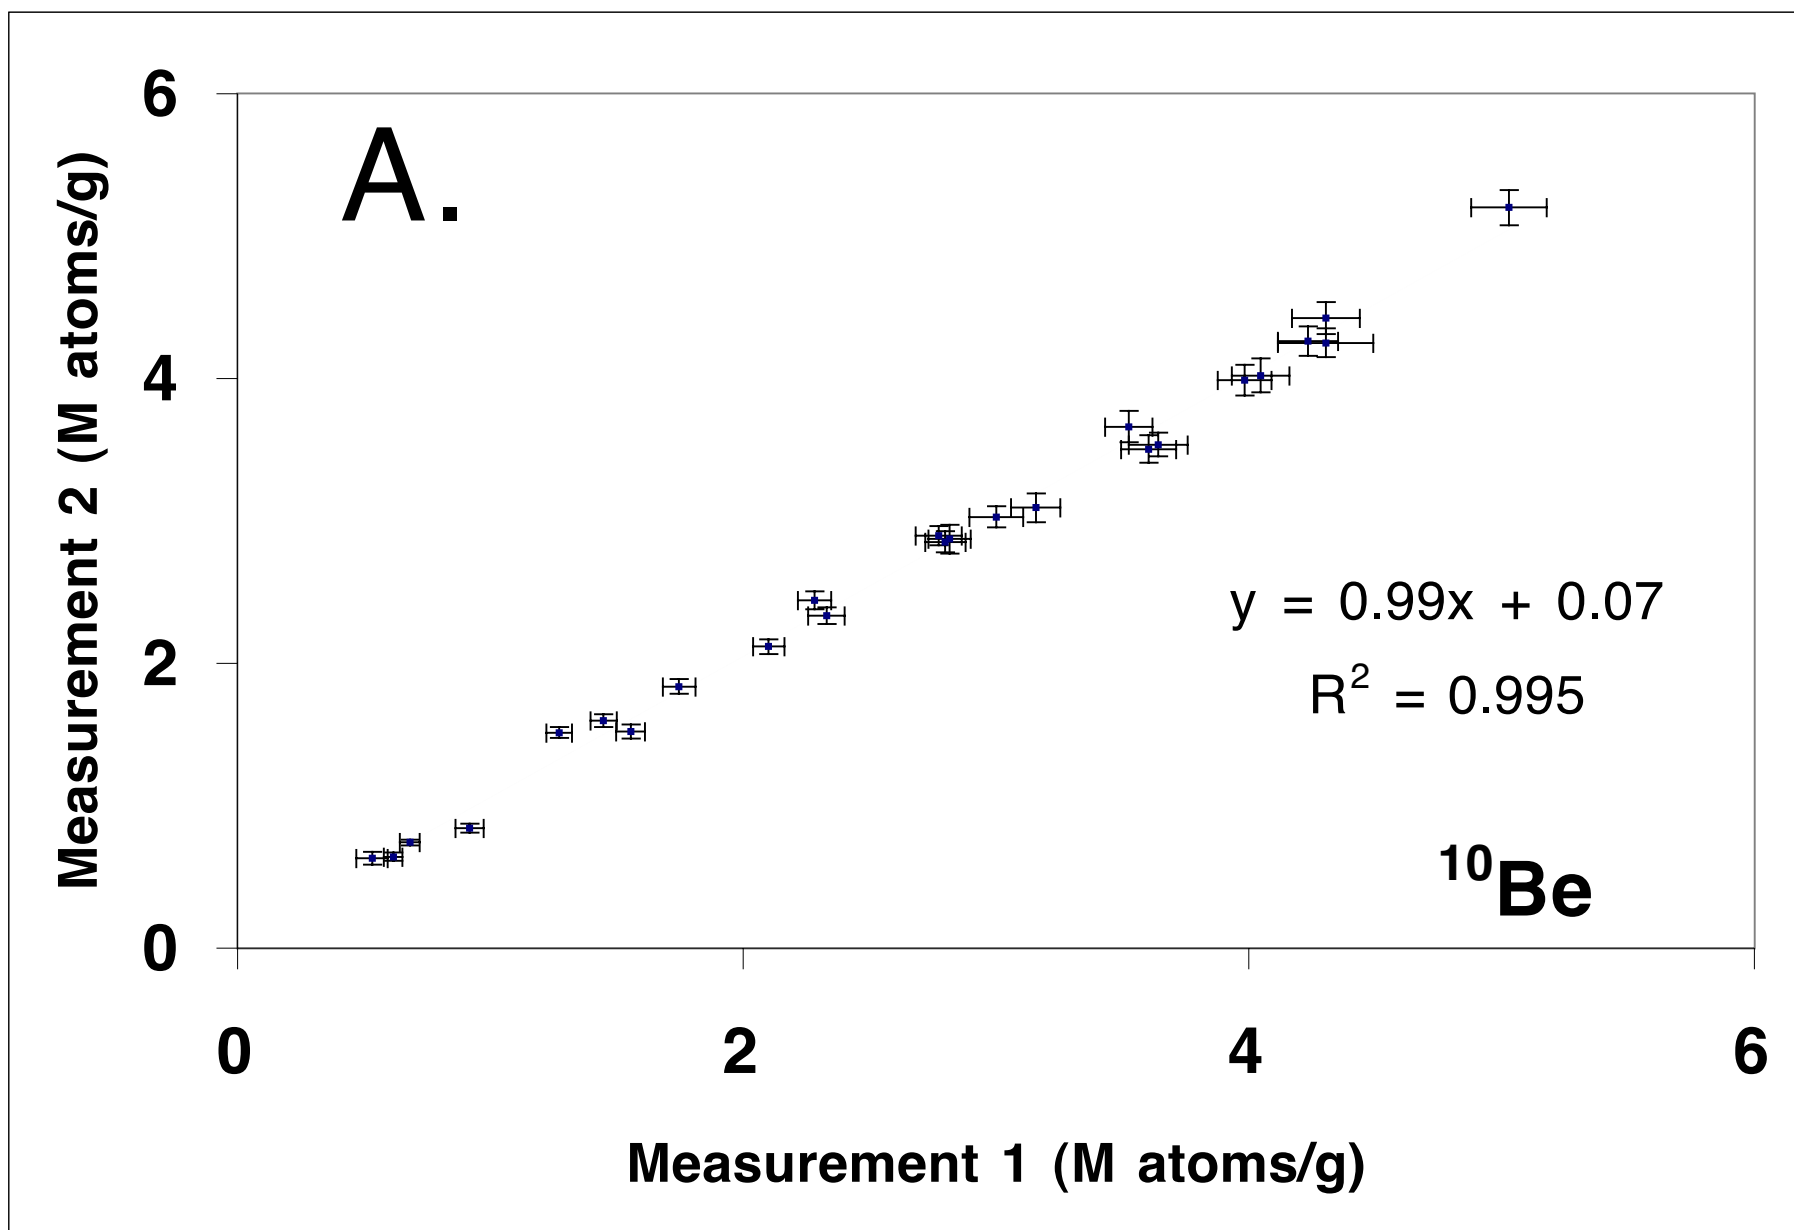

Comparison of 24 samples originally measured in 1994 and remeasured in 1999 and 2000

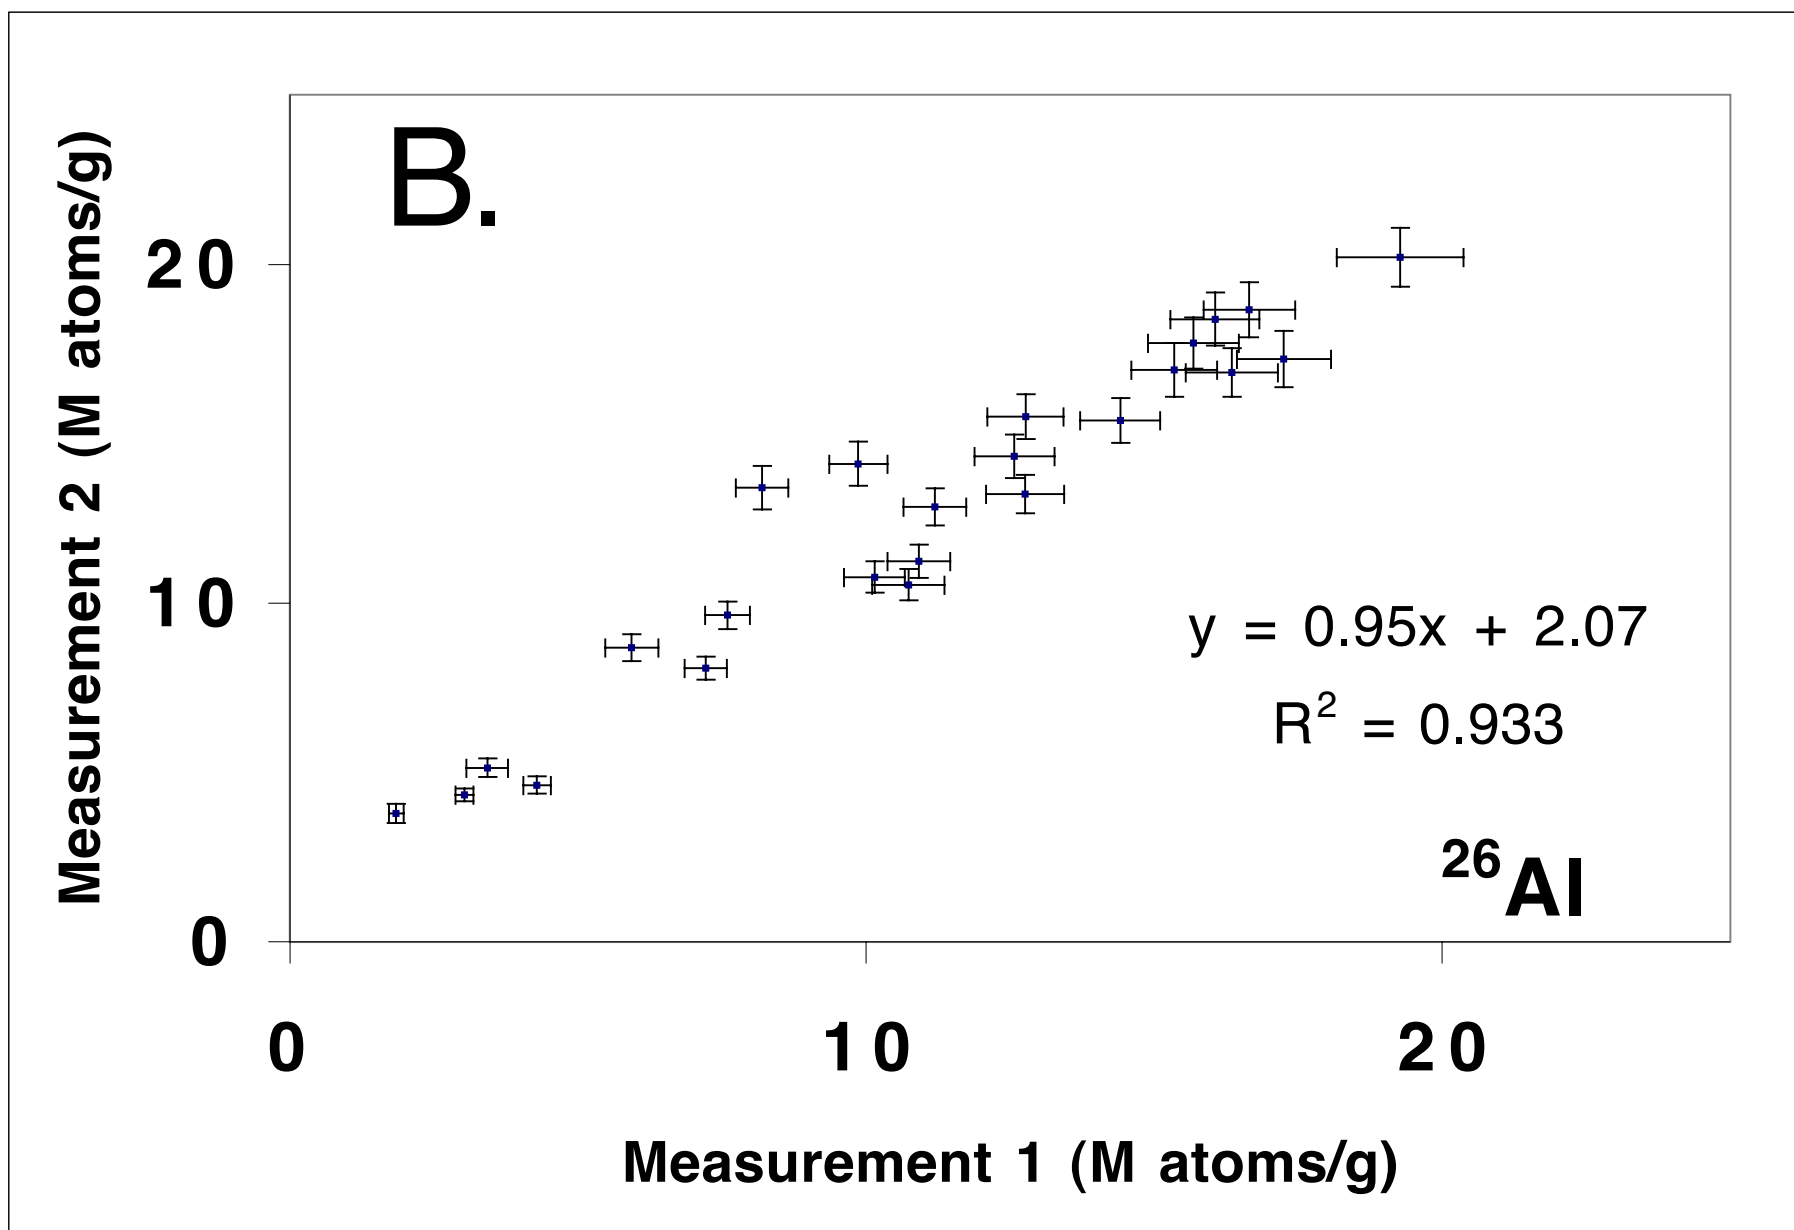

Comparison of 24 samples originally measured in 1994 and  
remeasured in 1999 and 2000
